# Supplementary material for: Conservation of core gene expression in vertebrate tissues
Source: Springer Nature journal article supplement (doi:10.1186/jbiol130), 2009-04-16
Supplement: 13061_2009_165_MOESM3_ESM.pdf [file 13061_2009_165_MOESM3_ESM.pdf]

Common tissue tree

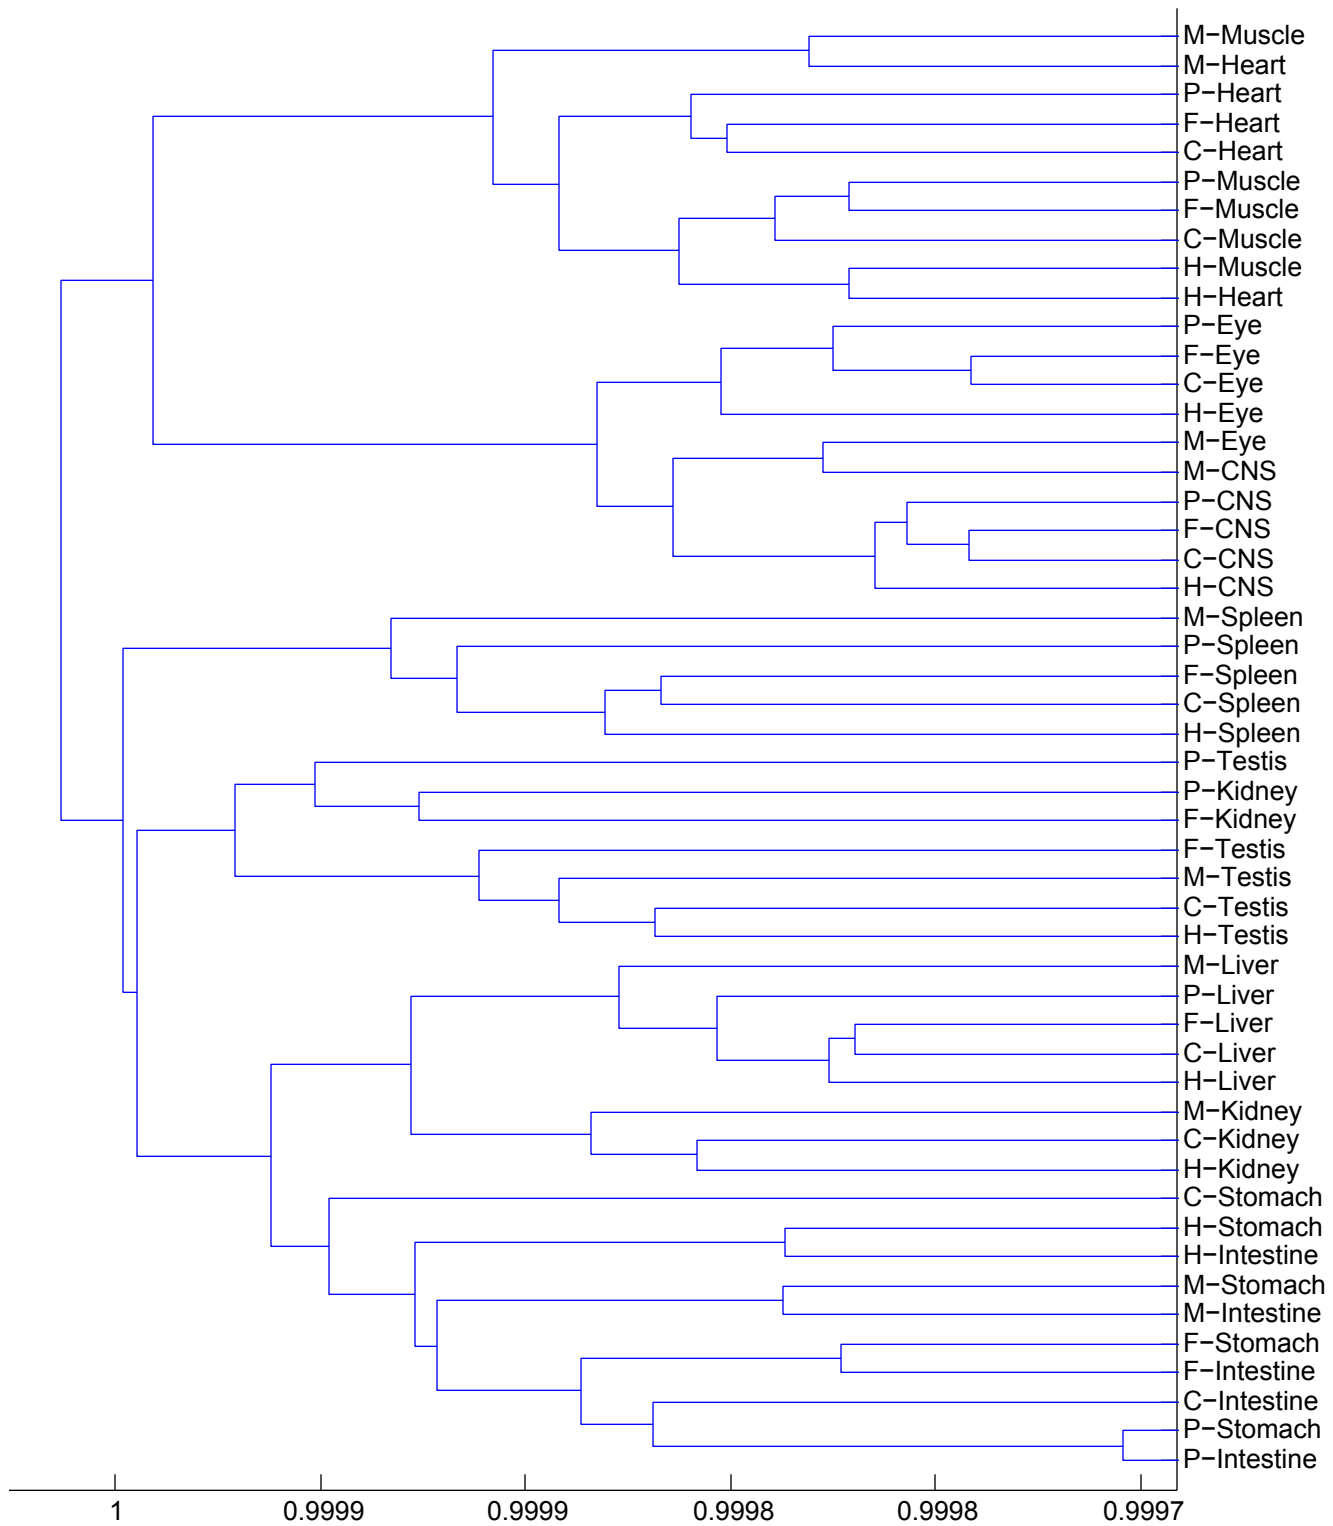

Dendrogram derived from 1- Pearson correlation of expression ratio vectors across all 3,074 measured genes using average linkage.
