# Supplementary material for: Conservation of core gene expression in vertebrate tissues
Source: Springer Nature journal article supplement (doi:10.1186/jbiol130), 2009-04-16

Pairwise species comparisons of expression similarity between orthologs (3,074) and randomly-matched genes (10,000) on expression ratios

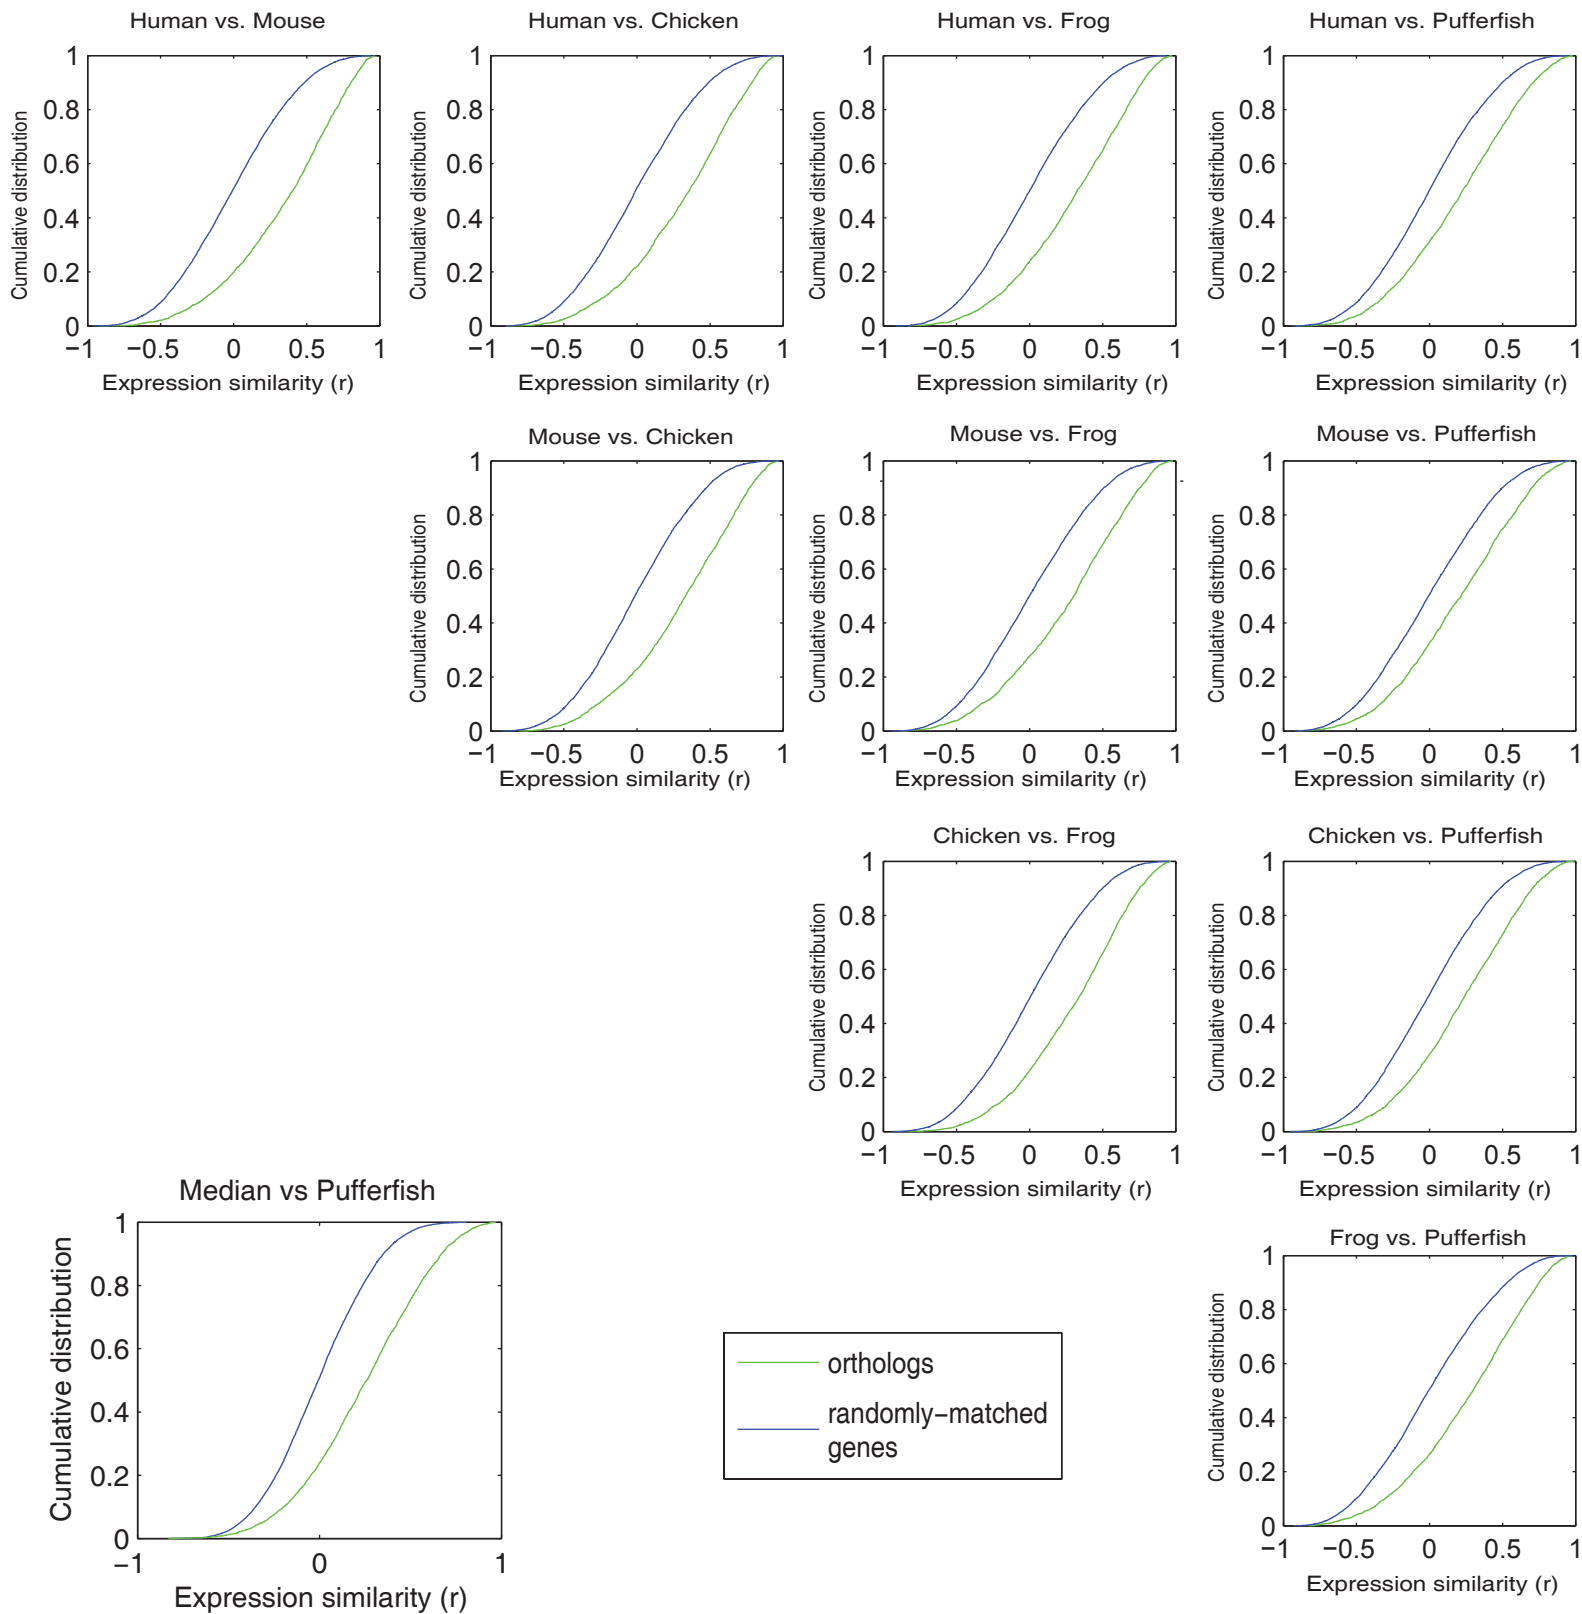

Supplement: 13061_2009_165_MOESM6_ESM.pdf [file 13061_2009_165_MOESM6_ESM.pdf]
