# Supplementary material for: Conservation of core gene expression in vertebrate tissues
Source: Springer Nature journal article supplement (doi:10.1186/jbiol130), 2009-04-16

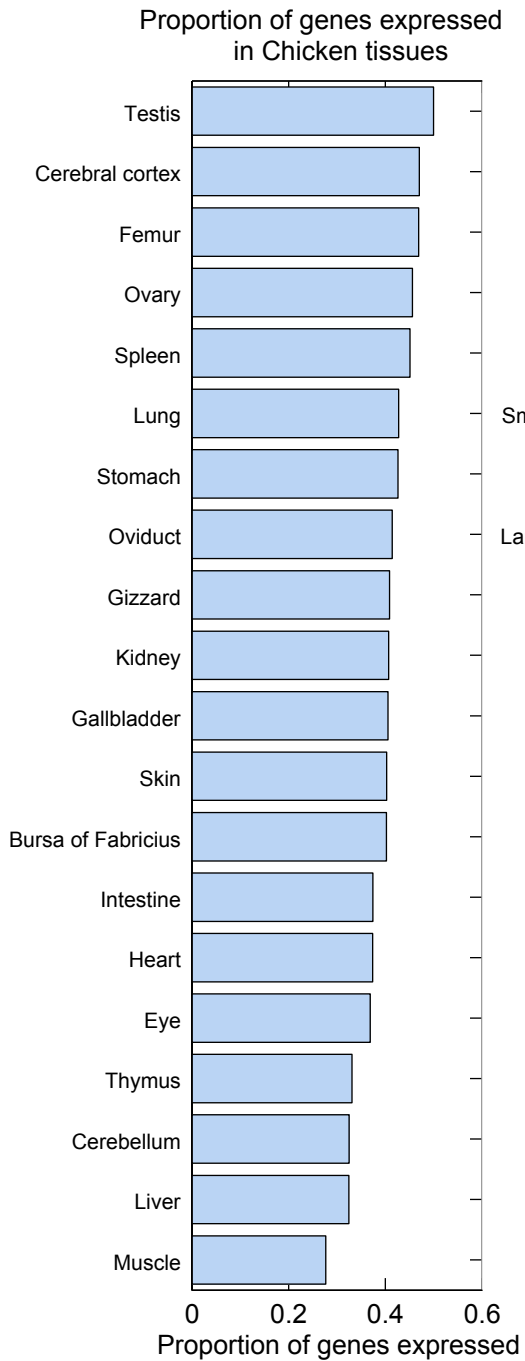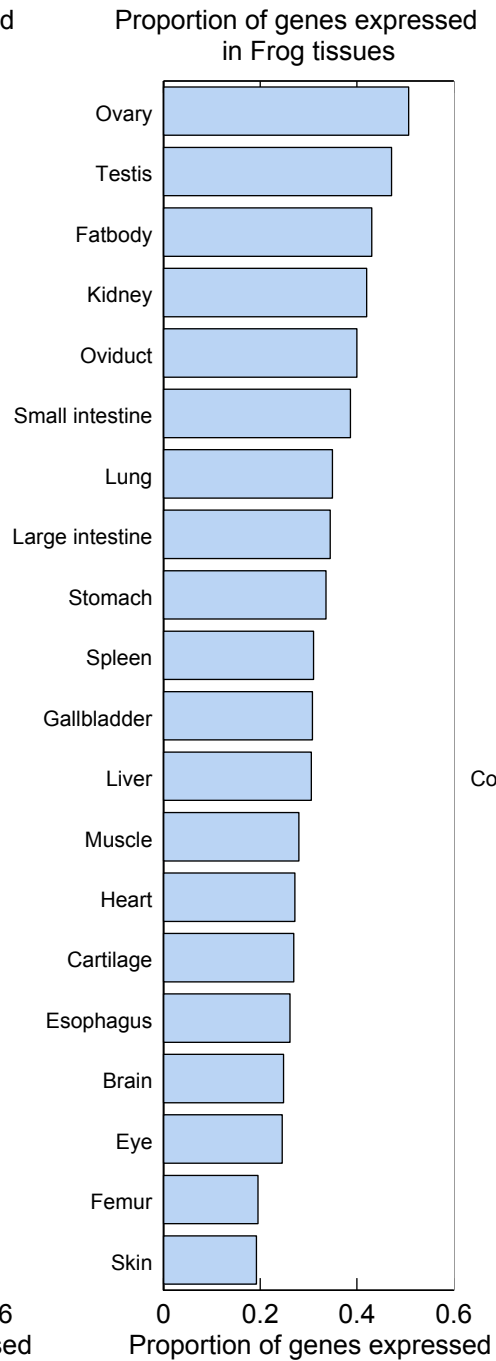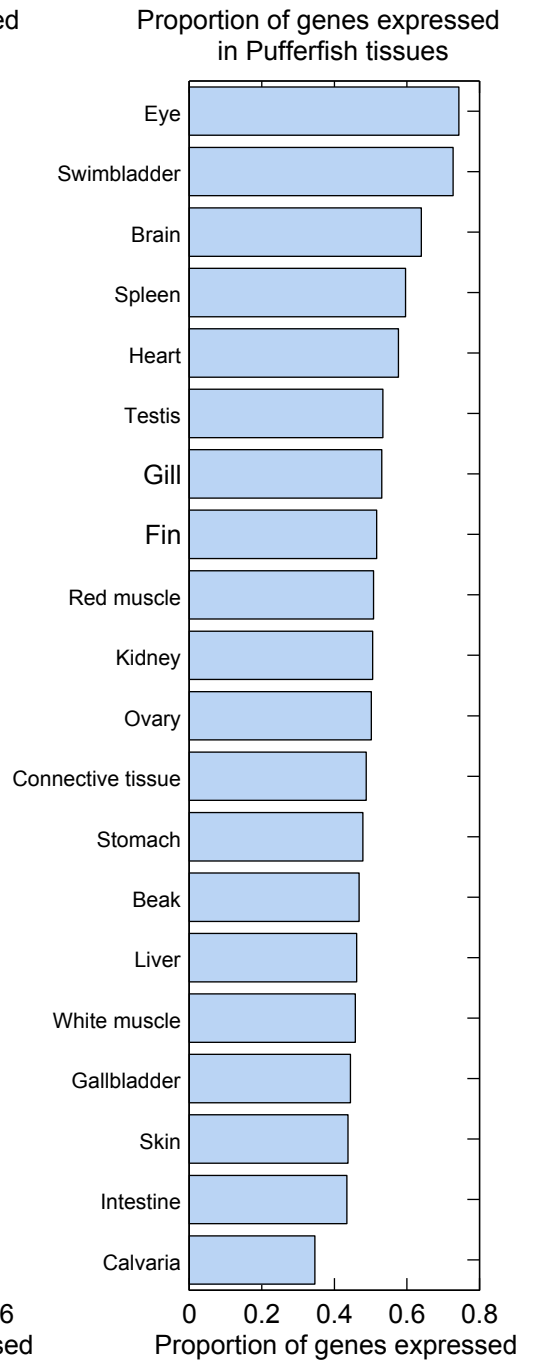

Supplement: 13061_2009_165_MOESM10_ESM.pdf [file 13061_2009_165_MOESM10_ESM.pdf]
